# Supplementary material for: Sustainable and Printable Nanocellulose-Based Ionogels as Gel Polymer Electrolytes for Supercapacitors
Source: MDPI journal article supplement (doi:10.3390/nano12020273), 2022-01-15
Supplement: s1 [file s1]

## Supplementary Materials

# Sustainable and printable nanocellulose-based ionogels as gel polymer electrolytes for supercapacitors

Rosa M. González-Gil <sup>1,2,†</sup>, Mateu Borràs <sup>3,4,†</sup>, Aiman Chbani <sup>3</sup>, Tiffany Abitbol <sup>5</sup>, Andreas Fall <sup>5</sup>, Christian Aulin <sup>5,6</sup>, Christophe Aucher <sup>3,\*</sup> and Sandra Martínez-Crespiera <sup>1,\*</sup>

<sup>1</sup> Applied Chemistry and Materials, ARTS Department, Leitat Technological Center, C/Pallars, 186-179,

08005 Barcelona, Spain; rosamaria.gonzalez@icn2.cat

<sup>2</sup> Novel Energy-Oriented Materials Group, Catalan Institute of Nanoscience and Nanotechnology, ICN2 (CSIC-BIST), Edifici ICN2, Campus UAB, 08193 Barcelona, Spain

<sup>3</sup> Energy and Engineering, ARTS Department, Leitat Technological Center, C/de la Innovació, 2,

08225, Barcelona, Spain; mateu@bioo.tech (M.B.); achbani@leitat.org (A.C.)

<sup>4</sup> Arkyne Technologies SL (Bioo), C/de la Tecnologia, 17, 08840, Barcelona, Spain

<sup>5</sup> Bioeconomy and Health, RISE Research Institutes of Sweden, Drottning Kristinas väg 61,

114 28 Stock-holm, Sweden; tiffany.abitbol@ri.se (T.A.); [andreas.fall@ri.se](mailto:andreas.fall@ri.se) (A.F.); [Christian.aulin@Holmen.com](mailto:Christian.aulin@Holmen.com) (C.A.)

<sup>6</sup> Holmen Iggesund, 825 80 Iggesund, Sweden

\* Correspondence: [caucher@leitat.org](mailto:caucher@leitat.org) (C.A.); [sandramartinez@leitat.org](mailto:sandramartinez@leitat.org) (S.M.-C.); Tel.: +34 93 788 23 00 (S.M.-C.)

† These authors contributed equally to this work.

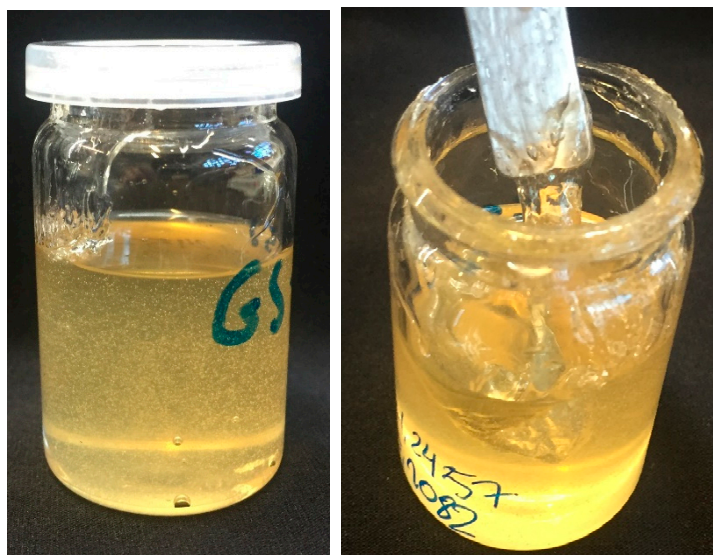

**Figure S1:** Final aspect of the as-prepared ionogels pictures.

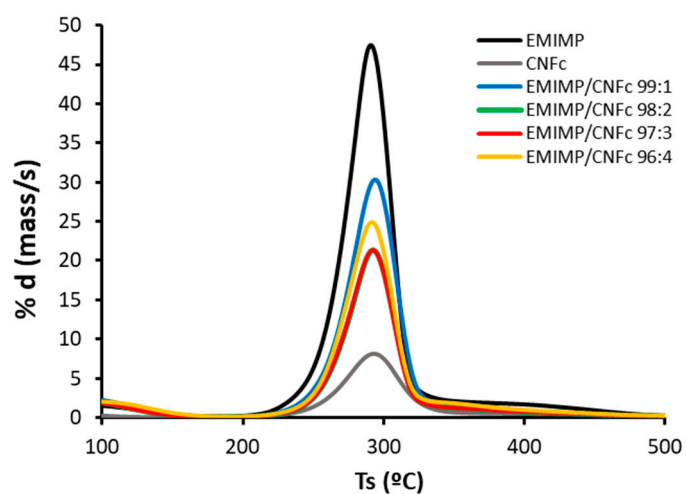

**Figure S2:** Differential scanning calorimetry thermogram (DSC) of the EMIMP/CNFc mixtures (99:1, 98:2, 97:3 and 96:4). Pristine CNFc and EMIMP were added for comparison purposes.

|                 | EMIMP/NC ratio | T decomposition (°C) |
|-----------------|----------------|----------------------|
| EMIMP           | 100:0          | 290,0                |
| CNFc            | 0:100          | 294,2                |
| EMIMP/CNFc 99:1 | 99:1           | 292,0                |
| EMIMP/CNFc 98:2 | 98:2           | 292,3                |
| EMIMP/CNFc 97:3 | 97:3           | 292,7                |
| EMIMP/CNFc 96:4 | 96:4           | 293,0                |

**Table S1:** Temperature decomposition for each EMIMP/CNFc mixtures (99:1, 98:2, 97:3 and 96:4) mixtures, obtained from differential scanning calorimetry thermograms (DSC). Pristine CNFc and EMIMP temperatures are also added.

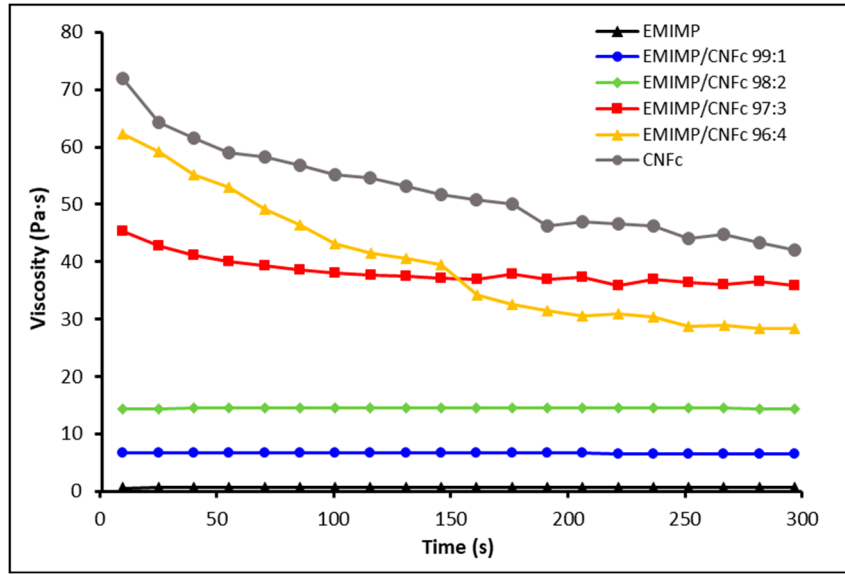

**Figure S3:** Rheological results at room temperature vs. time of the EMIMP/CNFc mixtures (99:1, 98:2, 97:3 and 96:4). Pristine CNFc and EMIMP are added for comparison purposes.

| Electrolyte | i<br>(mA/cm <sup>2</sup> ) | C <sub>e</sub> (F<br>g <sup>-1</sup> ) | ESR (Ω<br>cm <sup>-2</sup> ) | E <sub>max</sub><br>(Wh kg <sup>-1</sup> ) | P <sub>max</sub> (W kg <sup>-1</sup> ) |
|-------------|----------------------------|----------------------------------------|------------------------------|--------------------------------------------|----------------------------------------|
| EMIMP       | 0.5                        | 109±3                                  | 15±1                         | 15.2±0.5                                   | 5872.2±490.3                           |
|             | 1                          | 99± 4                                  | 14.7±<br>0.7                 | 13.5±0.7                                   | 5924.9±485.5                           |
|             | 2                          | 75±4                                   | 14.6±0.7                     | 10.2±0.7                                   | 6003.3±475.9                           |
|             | 5                          | 35±4                                   | 14.7±0.5                     | 5.5±1.4                                    | 5974.7±473.5                           |
|             | 10                         | 10±3                                   | 15.4±0.6                     | 1.5±0.9                                    | 5908.8±764.1                           |
| EMIMP99:1   | 0.5                        | 159±7                                  | 11±2                         | 22.7±1.2                                   | 9536.2±2219.8                          |
|             | 1                          | 132± 4                                 | 8.2± 0.8                     | 18.7±0.7                                   | 11,280.3±2169.9                        |
|             | 2                          | 105±3                                  | 7.7±0.8                      | 14.4±0.5                                   | 11,796.8±2093.7                        |
|             | 5                          | 59±6                                   | 8.4±0.6                      | 7.9±1.1                                    | 11,155.5±2209.7                        |
|             | 10                         | 29±7                                   | 7.9±0.8                      | 3.6±1.1                                    | 10,934±1987                            |
| EMIMP98:2   | 0.5                        | 174±9                                  | 11±4                         | 24.1±1.6                                   | 7618.5±2107.4                          |
|             | 1                          | 156± 11                                | 10± 2                        | 21.5±1.8                                   | 8132.8±2364.1                          |
|             | 2                          | 127±15                                 | 9±2                          | 17.8±2.5                                   | 8311.8±2479.6                          |
|             | 5                          | 73±21                                  | 10±2                         | 10.3±3.6                                   | 8107.3±2487.9                          |
|             | 10                         | 30±16                                  | 10±2                         | 4.2±2.7                                    | 7695±2462                              |
| EMIMP97:3   | 0.5                        | 172±6                                  | 12±1                         | 24.0±1.2                                   | 7677.7±938                             |
|             | 1                          | 160± 6                                 | 10.2±<br>0.7                 | 22.3±1.2                                   | 8841.9±790.6                           |
|             | 2                          | 139±9                                  | 9.7±0.5                      | 19.3±1.8                                   | 9330±659                               |
|             | 5                          | 93±12                                  | 9.6±0.3                      | 12.9±2.4                                   | 9332.7±350.2                           |
|             | 10                         | 44±9                                   | 10.2±0.2                     | 6.2±1.8                                    | 8823±525                               |
| EMIMP96:4   | 0.5                        | 165±4                                  | 7.4±0.5                      | 22.5±0.8                                   | 12,717±986                             |
|             | 1                          | 152± 5                                 | 5.6± 0.6                     | 20.8±0.9                                   | 16,023±1524                            |
|             | 2                          | 130±8                                  | 5.3±0.3                      | 18.1±1.3                                   | 16,729.1±1723.5                        |
|             | 5                          | 91±12                                  | 5.4±0.2                      | 13.3±2.0                                   | 16,429.1±1767.6                        |
|             | 10                         | 56±11                                  | 5.7±0.3                      | 8.5±1.8                                    | 15,463.4±1415.7                        |

**Table S2:** Summary of the key performance parameters on different current density such as specific capacitance, ESR,  $E_{\max}$  and  $P_{\max}$

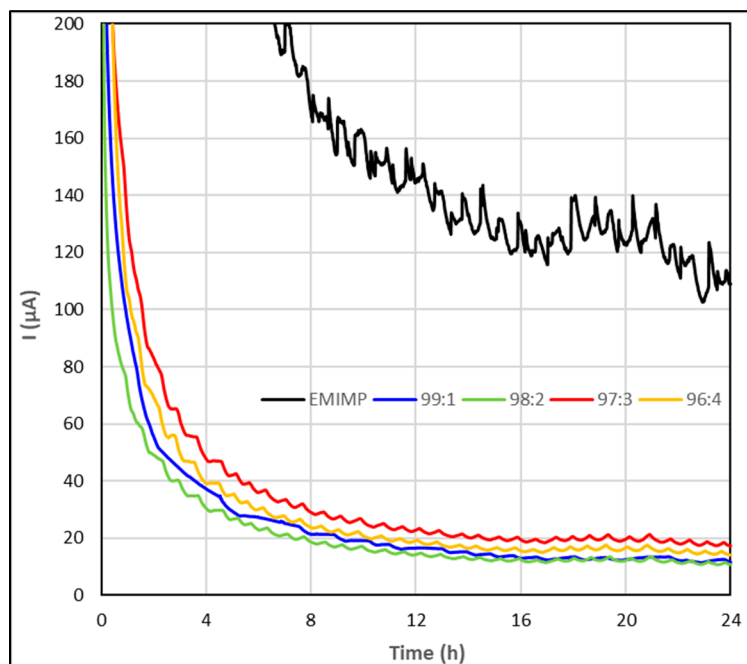

**Figure S4:** Current ( $\mu\text{A}$ ) vs. time for supercapacitors with EMIMP and EMIMP/CNFc (99:1, 98:2, 97:3 and 96:4) as electrolytes for a period of 24h

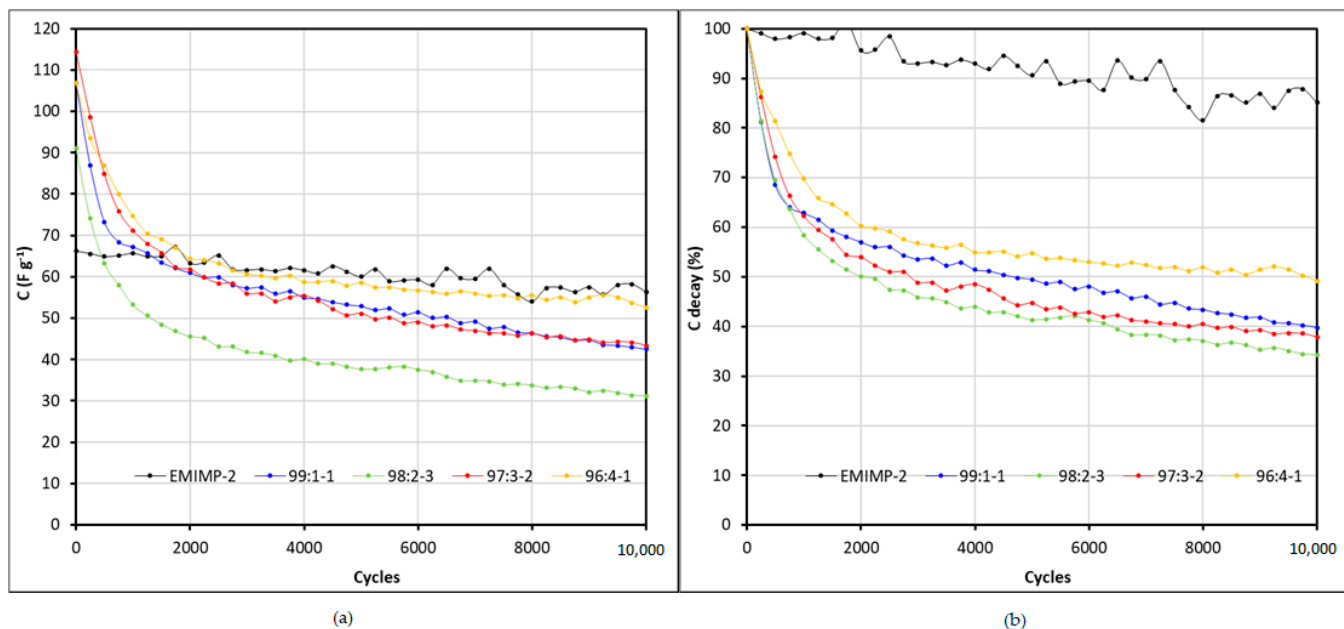

**Figure S5:** The capacity variation with the cycles and for supercapacitors with EMIMP and EMIMP/CNFc (99:1, 98:2, 97:3 and 96:4) as electrolytes.

| Electrolyte | i (mA/cm <sup>2</sup> ) | C <sub>e</sub> (F g <sup>-1</sup> ) | ESR (Ω cm <sup>-2</sup> ) |
|-------------|-------------------------|-------------------------------------|---------------------------|
| EMIMP/CMC   | 0.5                     | 153±3                               | 11.8±1                    |
|             | 1                       | 123± 4                              | 10.6± 0.7                 |
|             | 2                       | 96±4                                | 10.3±0.7                  |
|             | 5                       | 54±4                                | 10.4±0.5                  |
|             | 10                      | 23±3                                | 10.6±0.6                  |
| EMIMP99:1   | 0.5                     | 159±7                               | 11±2                      |
|             | 1                       | 132± 4                              | 8.2± 0.8                  |
|             | 2                       | 105±3                               | 7.7±0.8                   |
|             | 5                       | 59±6                                | 8.4±0.6                   |
|             | 10                      | 29±7                                | 7.9±0.8                   |

**Table S3:** Summary of the key performance parameters on different current density such as specific capacitance and ESR of EMIMP/CMC vs EMIMP/CNFc 99:1

|           | Scan rate (mV s <sup>-1</sup> ) | C <sub>e</sub> (F g <sup>-1</sup> ) |
|-----------|---------------------------------|-------------------------------------|
| EMIMP     | 10                              | 2.4                                 |
|           | 50                              | 0.6                                 |
| EMIMP99:1 | 10                              | 6.9                                 |
|           | 50                              | 1.1                                 |
| EMIMP98:2 | 10                              | 8.1                                 |
|           | 50                              | 1.1                                 |
| EMIMP97:3 | 10                              | 8.3                                 |
|           | 50                              | 1.2                                 |
| EMIMP96:4 | 10                              | 7.3                                 |
|           | 50                              | 1.1                                 |

**Table S4:** Summary of specific capacitance of EMIMP and ionogels with different ratio of CNF<sub>c</sub> at 10 mV s<sup>-1</sup> and 50 mV s<sup>-1</sup>

scan rate for CV

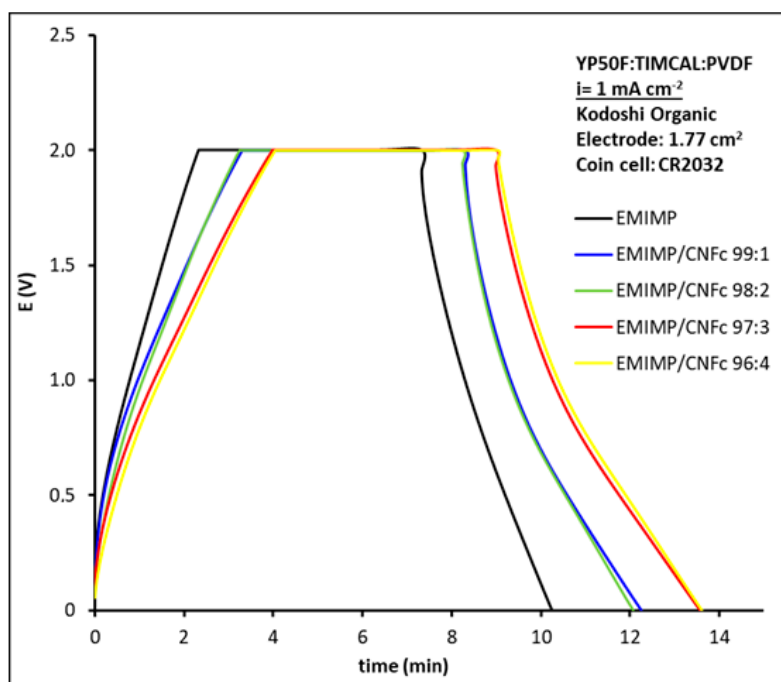

**Figure S6:** Galvanostatic charge-discharge curve of EMIMP and ionogels with different ratio of CNFc at  $i = 1 \text{ mA cm}^{-2}$

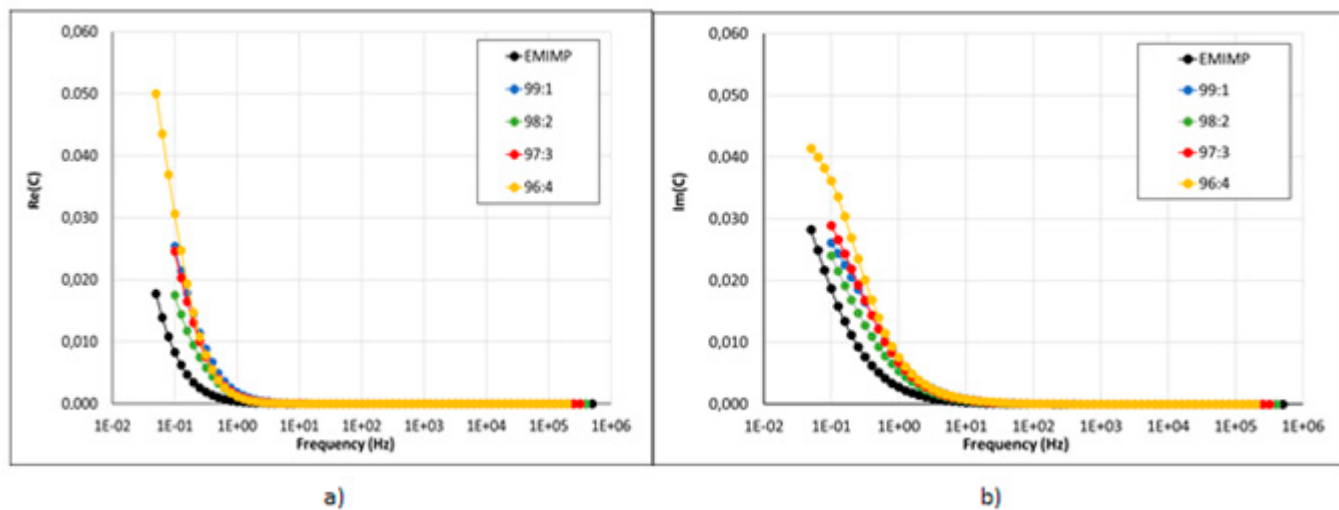

**Figure S7:** a) Real part of the capacitance vs Frequency and b) Imaginary part of the capacitance versus Frequencies of EMIMP and ionogels with different ratio of CNFc
